# Supplementary material for: Care of Geriatric Patients with Lumbar Spine, Pelvic, and Acetabular Fractures before and after Certification as a Geriatric Trauma Center DGU®: A Retrospective Cohort Study
Source: MDPI journal article supplement (doi:10.3390/medicina57080794), 2021-07-31
Supplement: s1 [file medicina-1298459-supplementary.pdf › medicina-1298459-supplementary.pdf]

**Title:** Care of geriatric patients with lumbar spine, pelvic, and acetabular fractures before and after certification as a Geriatric Trauma Center DGU®: a retrospective cohort study.

**Authors:** Tobias Hafner, Alina Kollmeier, Markus Laubach, Matthias Knobe, Frank Hildebrand, Miguel Pishnamaz

**Journal:** Medicina

## Supplementary Materials

**Table S1: Detailed Geriatric Assessment**

| Test          | n (%)      |
|---------------|------------|
| ISAR          | 196 (87.5) |
| ISAR <2       | 49 (25.0)  |
| ISAR ≥ 2      | 147 (75.0) |
| BI            | 146 (65.2) |
| BI 0-15       | 12 (8.3)   |
| BI 20-35      | 66 (45.2)  |
| BI 40-55      | 45 (30.8)  |
| BI 60-75      | 20 (13.6)  |
| BI 80-95      | 3 (2.1)    |
| mod. BI       | 79 (35.3)  |
| mod. BI 70-90 | 52 (65.8)  |
| mod. BI 20-65 | 27 (34.2)  |
| mod. BI 0-15  | 0          |
| MoCA          | 30 (13.4)  |
| MoCA ≥ 26     | 11 (36,7)  |
| MoCA < 26     | 19 (63,3)  |
| DemTect       | 39 (17.4)  |
| DemTect 13-18 | 4 (10,3)   |
| DemTect 9-12  | 8 (20,5)   |
| DemTect < 8   | 27 (69,2)  |
| GDS           | 95 (42.4)  |
| GDS 0-5       | 79 (83.2)  |
| GDS 6-10      | 14 (14.7)  |
| GDS 11-15     | 2 (2.1)    |
| MNA           | 109 (48.7) |
| MNA 24-30     | 34 (31.2)  |
| MNA 17-23.5   | 58 (53.2)  |
| MNA <17       | 17 (15,6)  |
| DEMMI         | 72 (32.1)  |

Data in absolute **n** and relative (%) frequencies. **ISAR** Identification of Seniors at Risk, **BI** Barthel-Index, **mod. BI** modified Barthel-Index, **MoCA** Montreal Cognitive Assessment, **GDS** Geriatric Depression Scale, **DEMMI** De Morton Mobility Index, **MNA** Mini Nutritional Assessment
